# Supplementary figures and images for: Updated Integrated Analysis of the Efficacy and Safety of Entrectinib in Patients With NTRK Fusion-Positive Solid Tumors
Source: PubMed Central journal article supplement — Clin Cancer Res. 2022 Feb 10;28(7):1302–12. doi: 10.1158/1078-0432.CCR-21-3597 (PMC9365368; doi:10.1158/1078-0432.ccr-21-3597), 2022-02-10

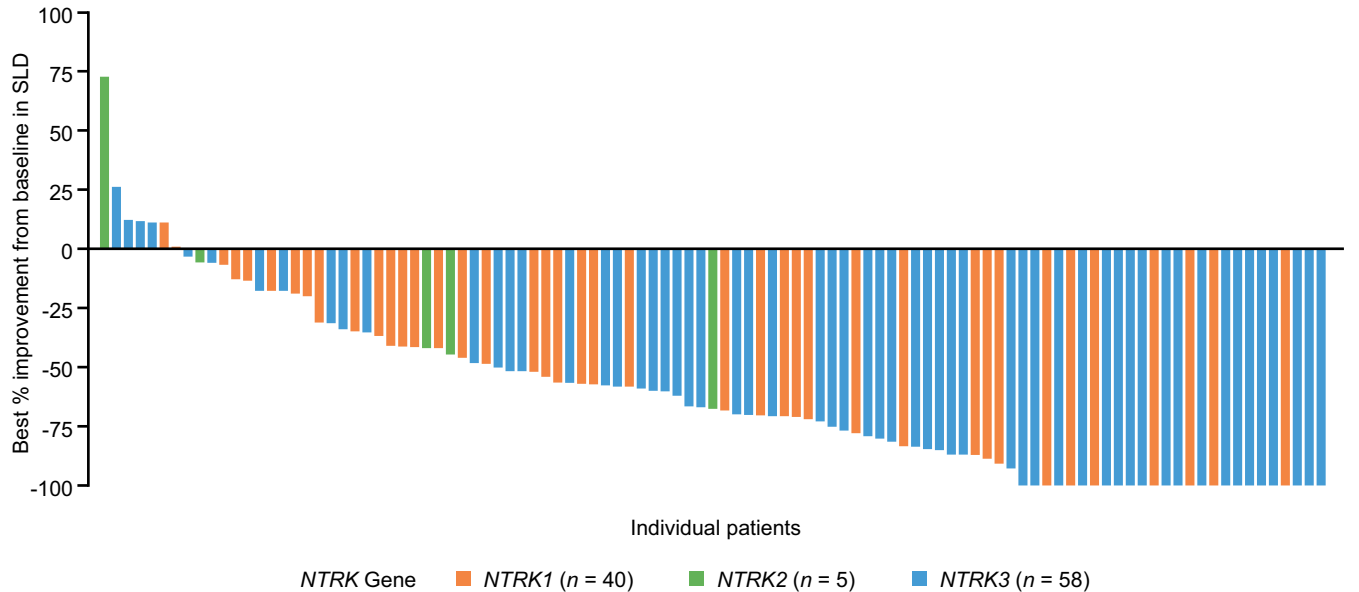

Supplement: ccr-21-3597_suppfiga2.pdf [file ccr-21-3597_suppfiga2.pdf]

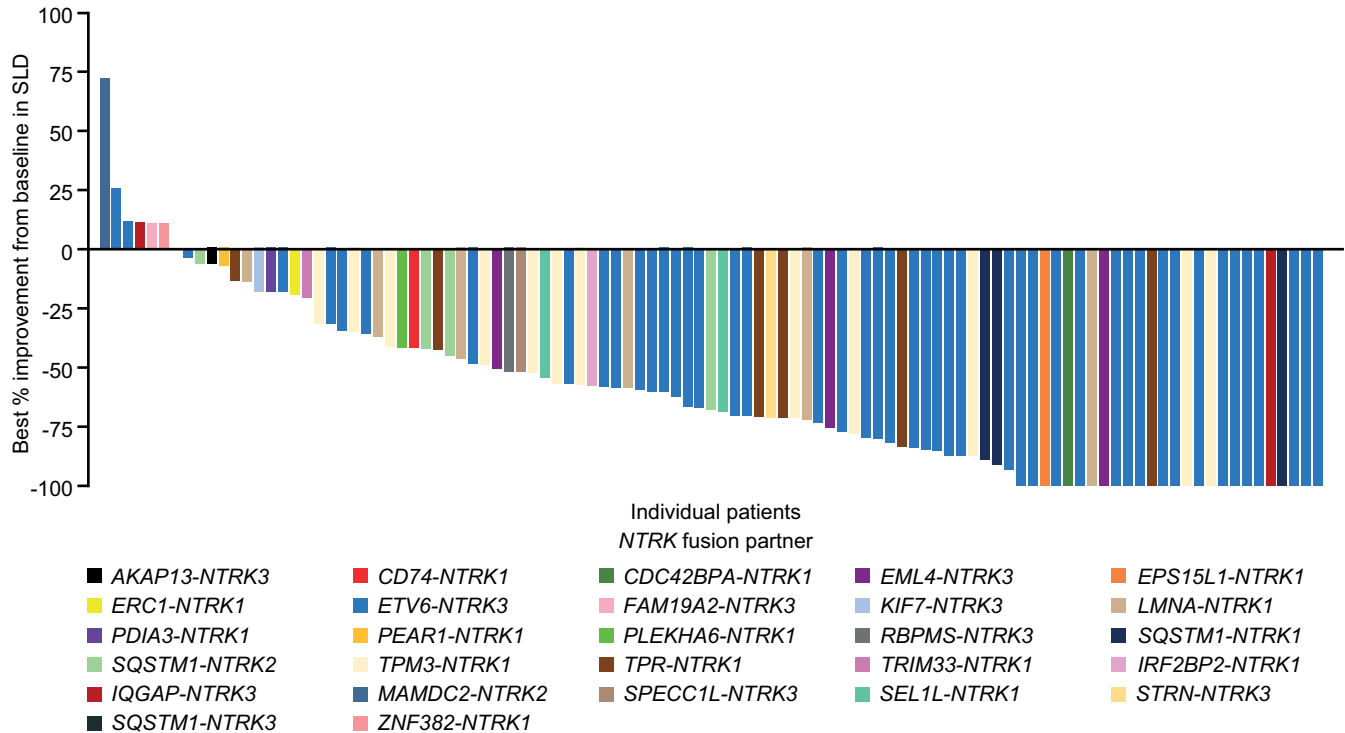

Supplement: ccr-21-3597_suppfiga3.pdf [file ccr-21-3597_suppfiga3.pdf]

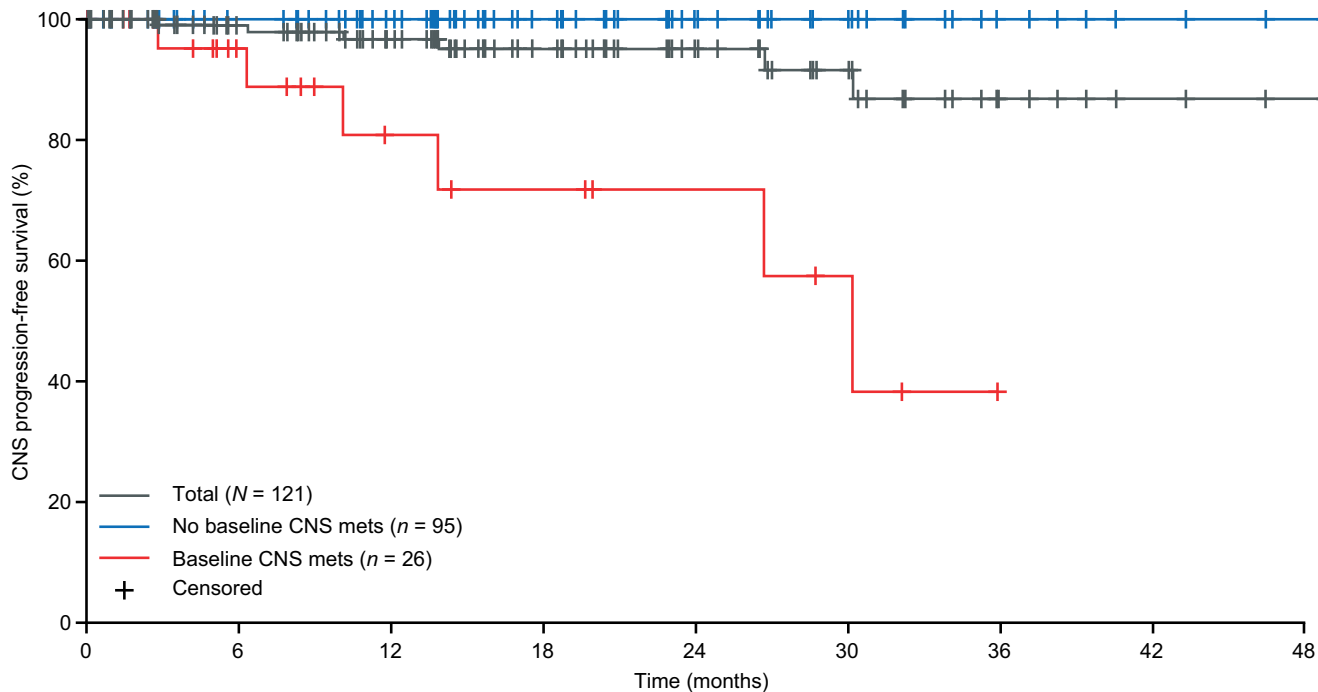

## Patients at risk

|                   | 0   | 3   | 6  | 9  | 12 | 15 | 18 | 21 | 24 | 27 | 30 | 33 | 36 | 39 | 42 | 45 | 48 |
|-------------------|-----|-----|----|----|----|----|----|----|----|----|----|----|----|----|----|----|----|
| Total             | 121 | 101 | 91 | 82 | 71 | 55 | 47 | 37 | 31 | 24 | 20 | 13 | 7  | 5  | 3  | 2  | 1  |
| No CNS metastases | 95  | 81  | 76 | 71 | 62 | 48 | 40 | 32 | 26 | 20 | 17 | 12 | 7  | 5  | 3  | 2  | 1  |
| CNS metastases    | 26  | 20  | 15 | 11 | 9  | 7  | 7  | 5  | 5  | 4  | 3  | 1  |    |    |    |    |    |

Supplement: ccr-21-3597_suppfiga4.pdf [file ccr-21-3597_suppfiga4.pdf]
